# Supplementary material
Source: PubMed Central journal article supplement (PMC3196116)
Supplement: supp_M111.291492_jbc.M111.291492-2.pdf [file supp_M111.291492_jbc.M111.291492-2.pdf]

**A** IP: anti-p38MAPK

Probe: PY99

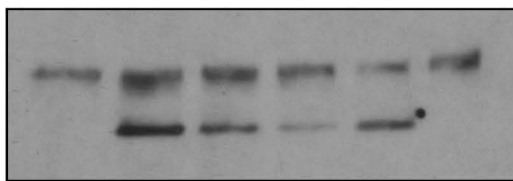

← IgG

← P-p38 MAPK  
(~43 kDa)Reprobe:  
anti-p38MAPK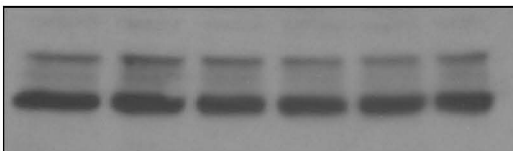← p38 MAPK  
(~43 kDa)

|        |   |   |    |    |    |    |            |
|--------|---|---|----|----|----|----|------------|
| IL-13  | - | + | +  | +  | +  | +  |            |
| PP2    | - | - | 25 | 50 | -  | -  | ( $\mu$ M) |
| PP3    | - | - | -  | -  | 50 | -  | ( $\mu$ M) |
| SU6656 | - | - | -  | -  | -  | 10 | ( $\mu$ M) |

**B** IP: anti-PKC $\delta$ Probe:  
PY99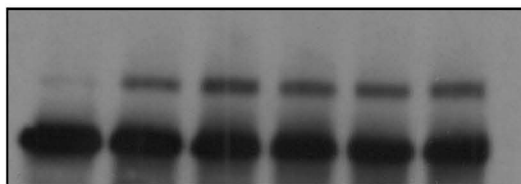← P-PKC $\delta$   
(~80 kDa)  
← IgGReprobe:  
anti-PKC $\delta$ 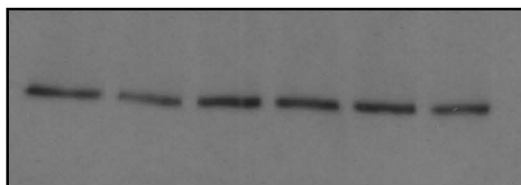← PKC $\delta$   
(~80 kDa)

|        |   |   |    |    |    |    |            |
|--------|---|---|----|----|----|----|------------|
| IL-13  | - | + | +  | +  | +  | +  |            |
| PP2    | - | - | 25 | 50 | -  | -  | ( $\mu$ M) |
| PP3    | - | - | -  | -  | 50 | -  | ( $\mu$ M) |
| SU6656 | - | - | -  | -  | -  | 10 | ( $\mu$ M) |
