# Supplementary material
Source: PubMed Central journal article supplement (PMC3196116)

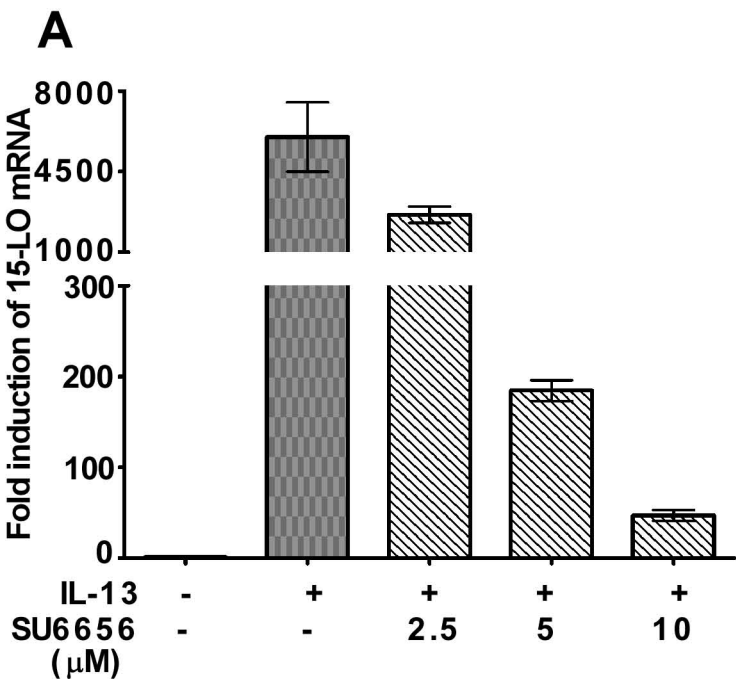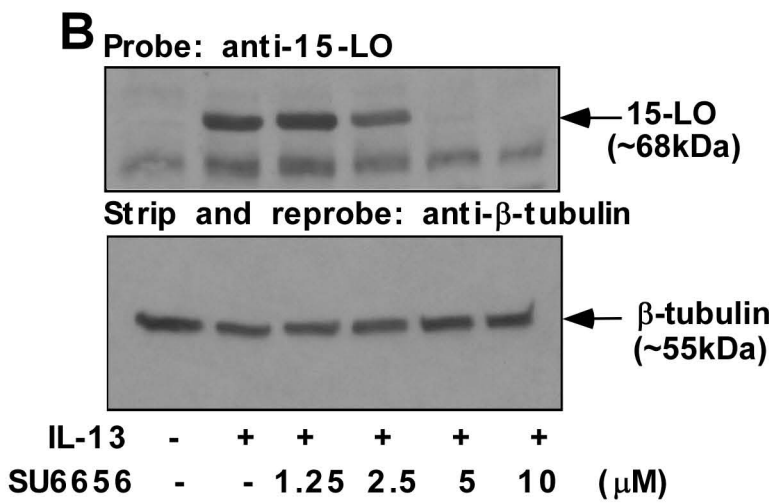

Supplement: supp_M111.291492_jbc.M111.291492-1.pdf [file supp_M111.291492_jbc.M111.291492-1.pdf]

**A**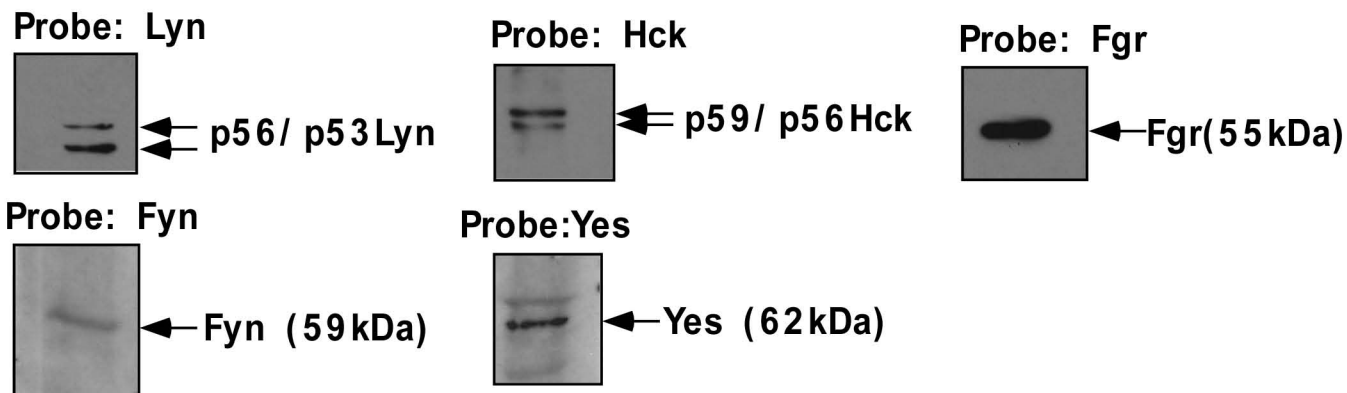**B**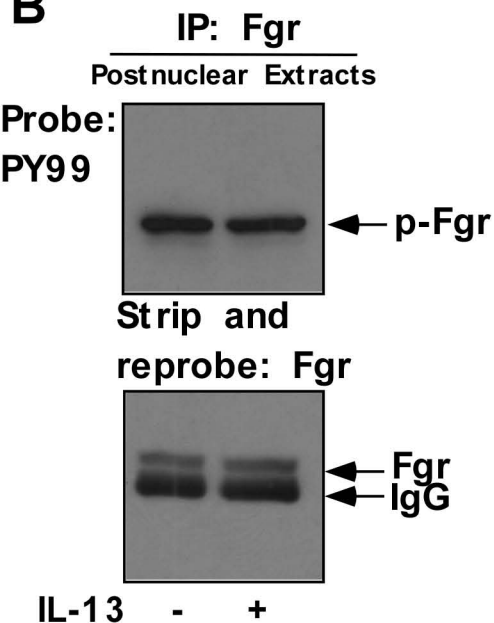**C**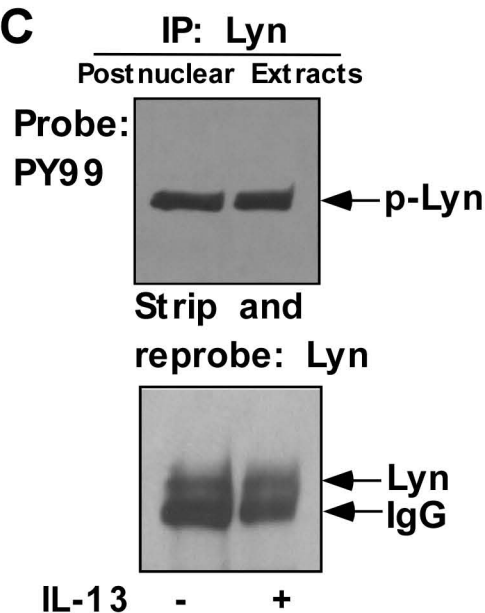

Supplement: supp_M111.291492_jbc.M111.291492-3.pdf [file supp_M111.291492_jbc.M111.291492-3.pdf]

# Supplemental Figure 4

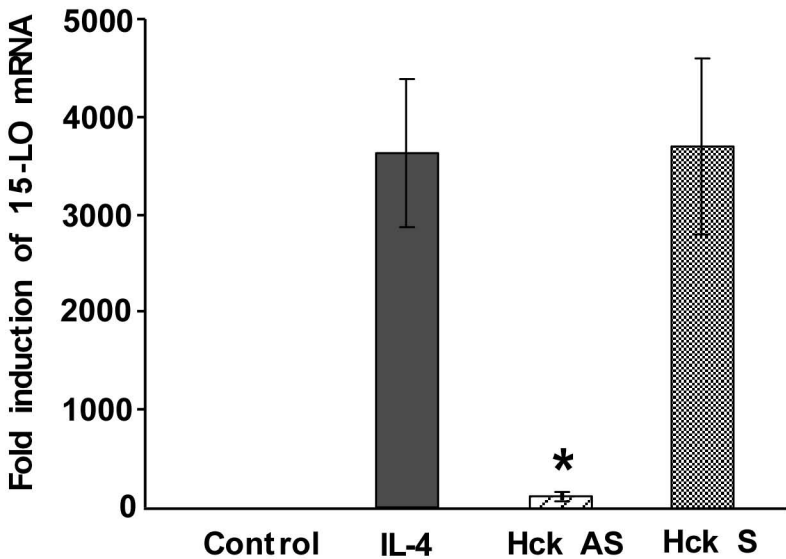

Supplement: supp_M111.291492_jbc.M111.291492-4.pdf [file supp_M111.291492_jbc.M111.291492-4.pdf]

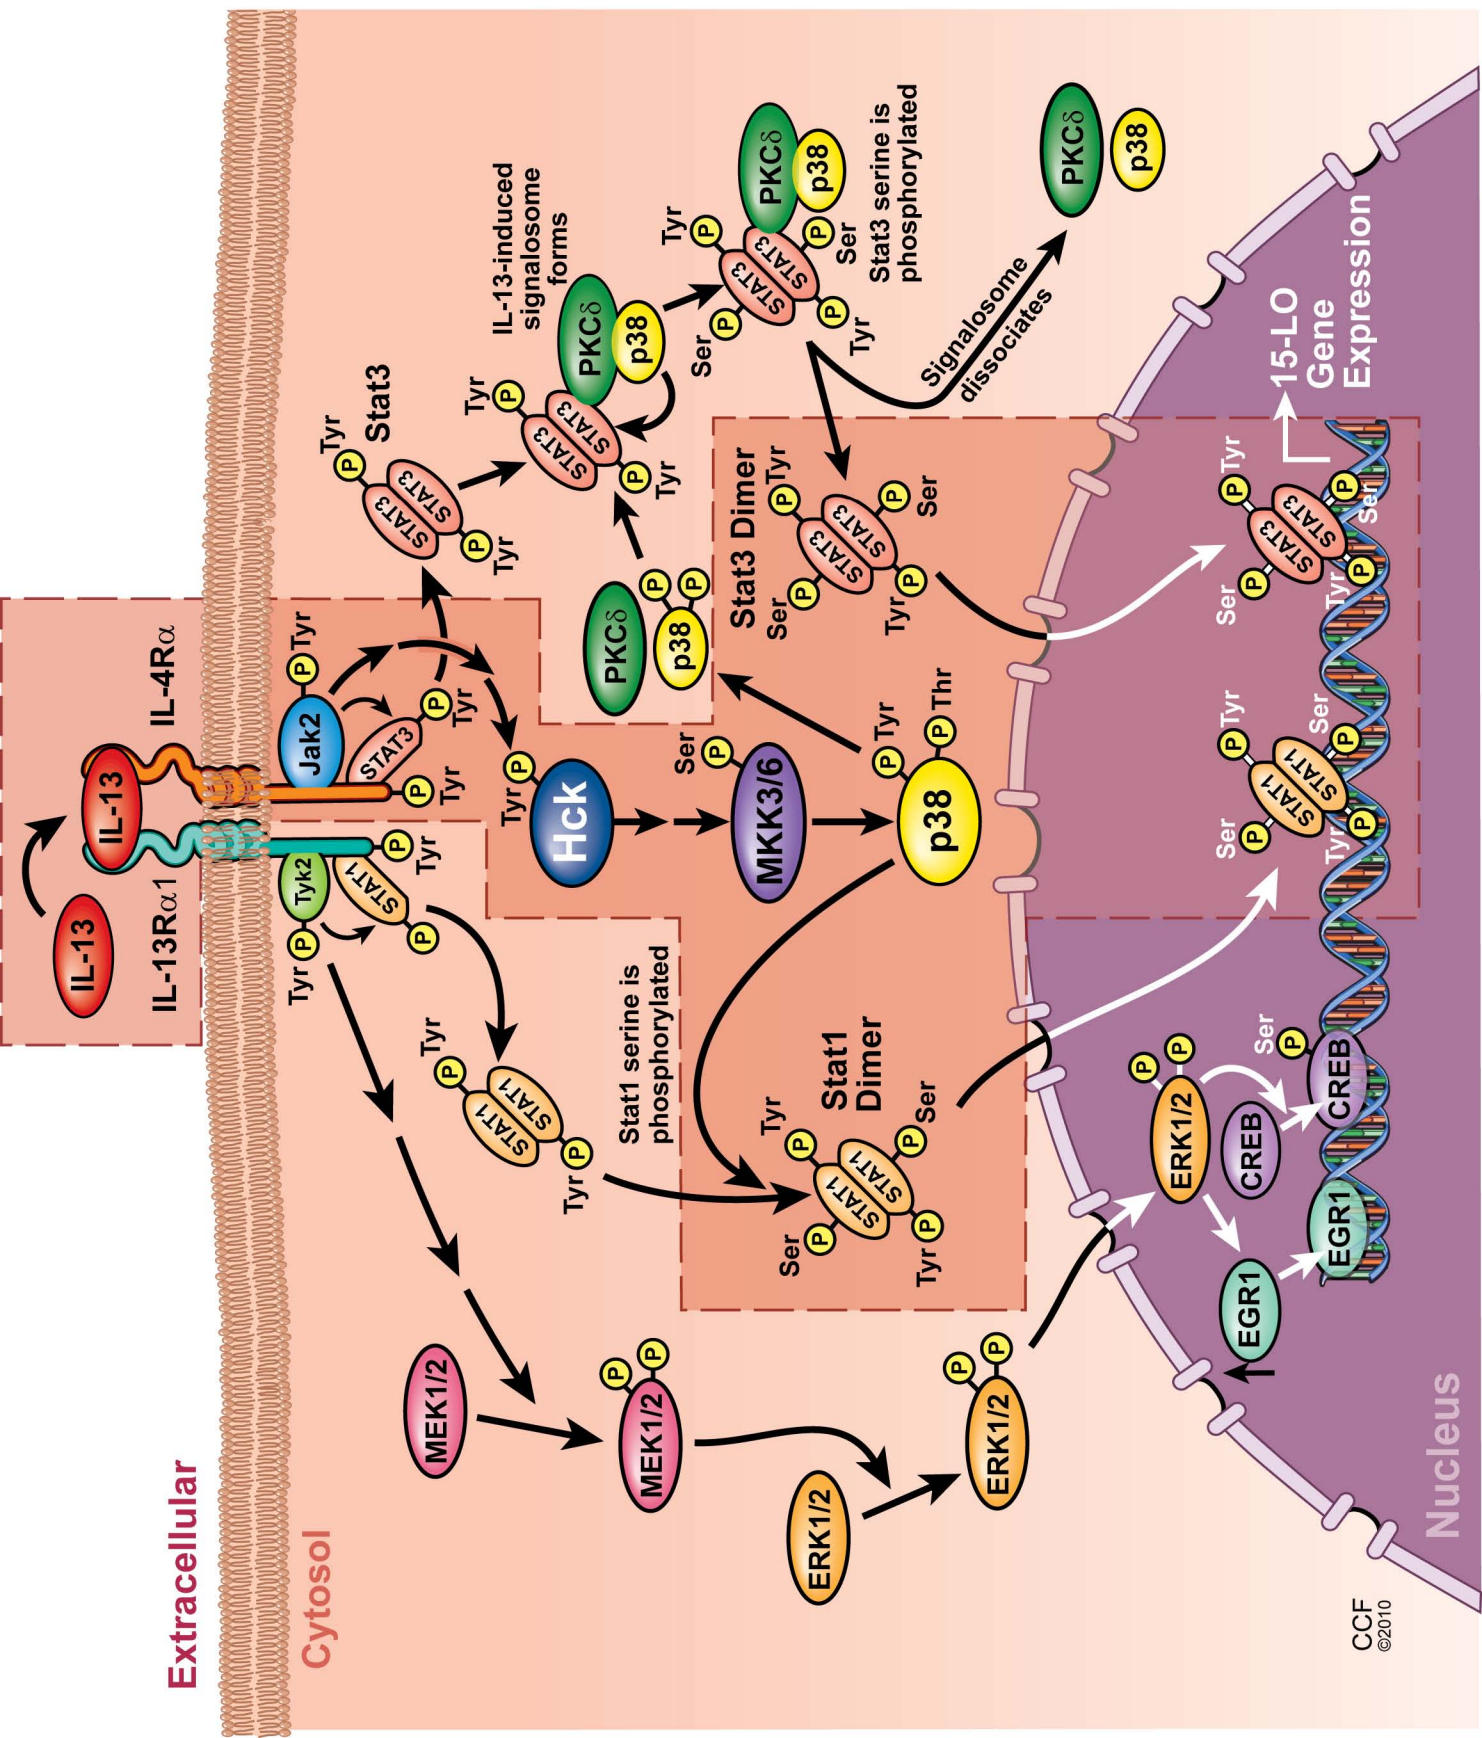

Supplement: supp_M111.291492_jbc.M111.291492-5.pdf [file supp_M111.291492_jbc.M111.291492-5.pdf]
